# Supplementary material for: Visible light-induced surface initiated atom transfer radical polymerization of methyl methacrylate on titania/reduced graphene oxide nanocomposite
Source: Royal Society of Chemistry journal article supplement (doi:10.1039/c4ra15615c), 2015-01-01

## **Supporting Information**

# **Visible light-induced surface initiated atom transfer radical polymerization of methyl methacrylate on titania/reduced graphene oxide nanocomposite**

Ankushi Bansal,<sup>a#</sup> Arvind Kumar,<sup>a#</sup> Pawan Kumar,<sup>a</sup> Alok K. Chatterjee,<sup>a</sup> Siddharth S. Ray<sup>a\*</sup> and Suman L. Jain<sup>a\*</sup>

CSIR-Indian Institute of Petroleum, Dehradun, India-248005

Fig. S1: a,b) SEM Image of  $\text{NH}_2\text{-TiO}_2/\text{rGO}$  nanocomposite; c) EDX analysis; (d) elemental analysis showing uniform distribution of Nitrogen (green dots).

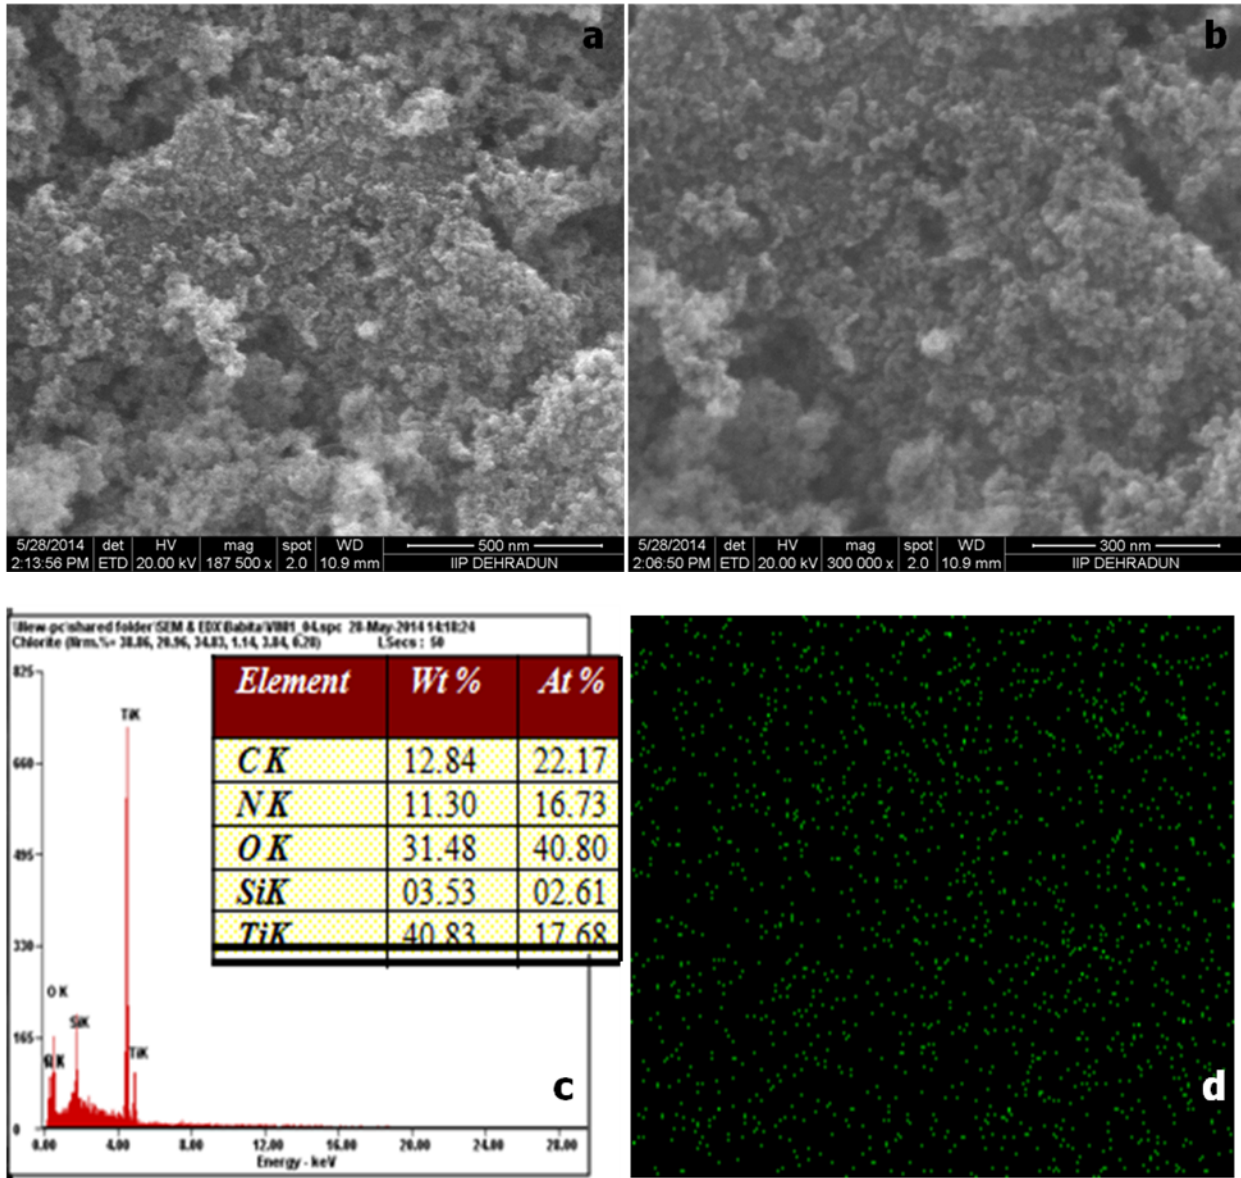

Fig. S2: (a,b)SEM image of Br@NH<sub>2</sub>-TiO<sub>2</sub>/rGO; (c) EDX analysis; (d)elemental analysis, yellow dots showing uniform distribution of Br.

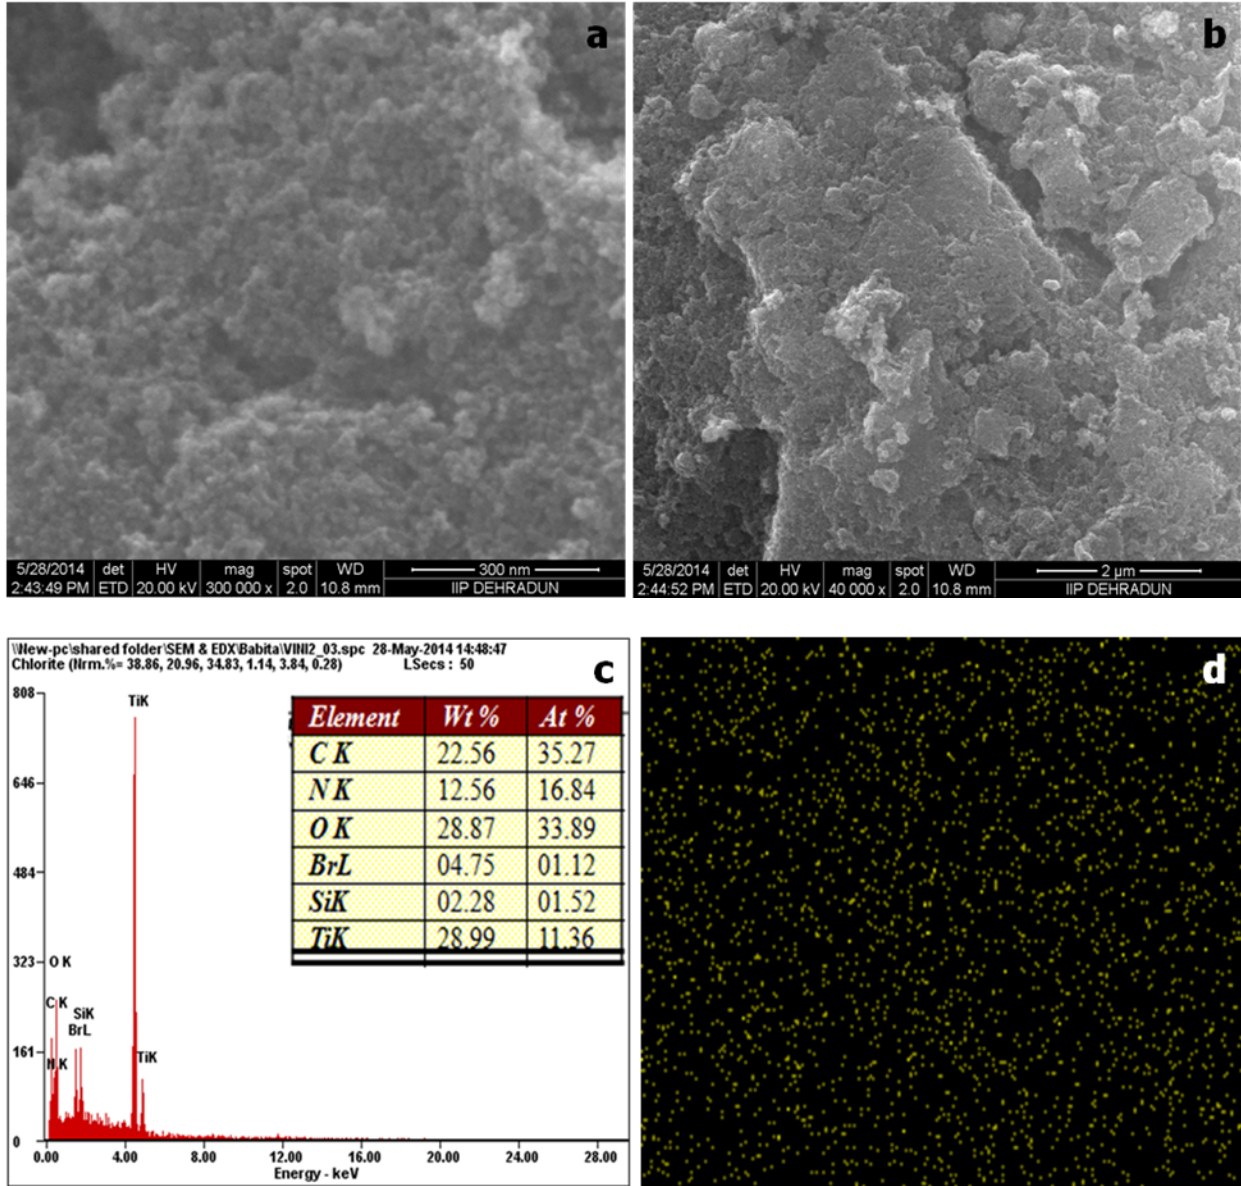

Fig. S3: (a) SEM; (b) TEM; (c) EDX analysis of Polymer functionalized TiO<sub>2</sub>/rGO (PMMA@Br@NH<sub>2</sub>-TiO<sub>2</sub>/rGO).

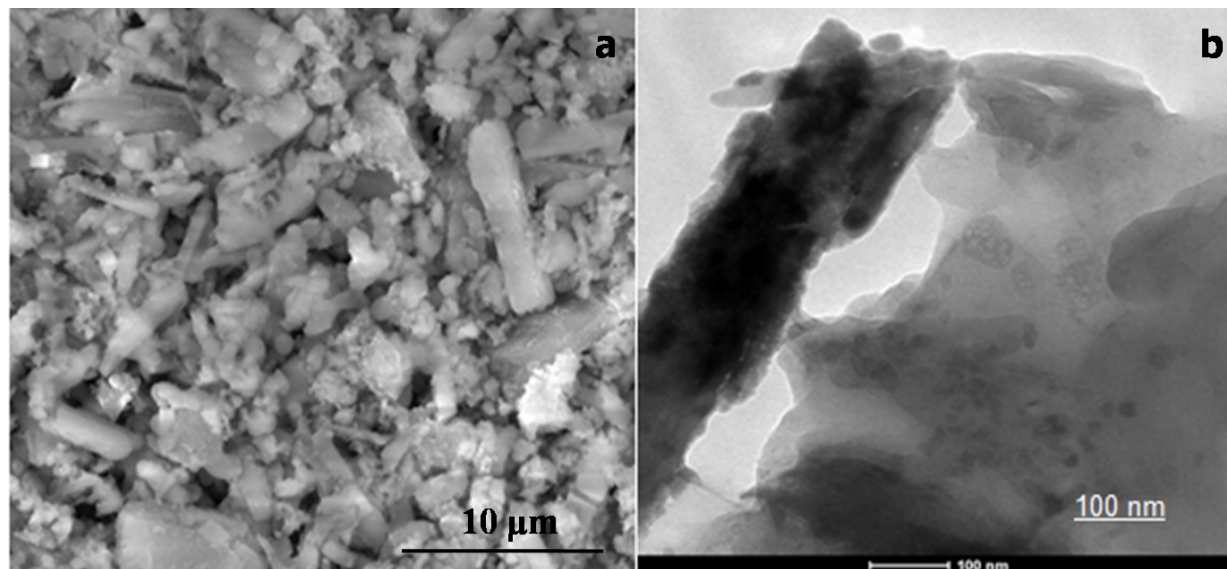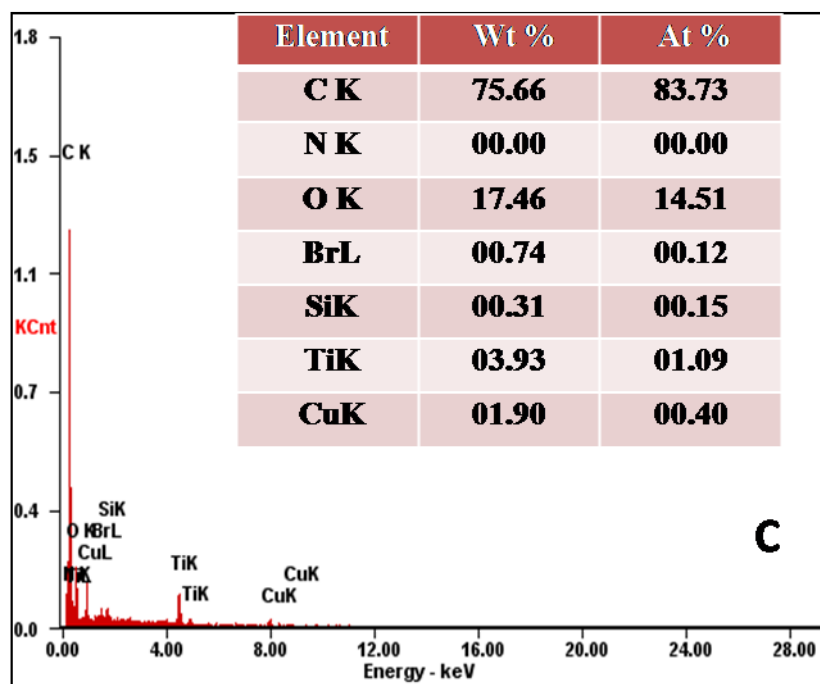

Supplement: c4ra15615c1.pdf [file c4ra15615c1.pdf]
